# Supplementary material for: Primrose syndrome: Characterization of the phenotype in 42 patients
Source: PubMed Central journal article supplement — Clin Genet. 2020 Apr 20;97(6):890–901. doi: 10.1111/cge.13749 (PMC7384157; doi:10.1111/cge.13749), 2020-04-20
Supplement: CGE-97-890-s003.pdf [file CGE-97-890-s003.pdf]

## 2 to 20 years: Boys Stature-for-age and Weight-for-age percentiles

NAME \_\_\_\_\_

RECORD # \_\_\_\_\_

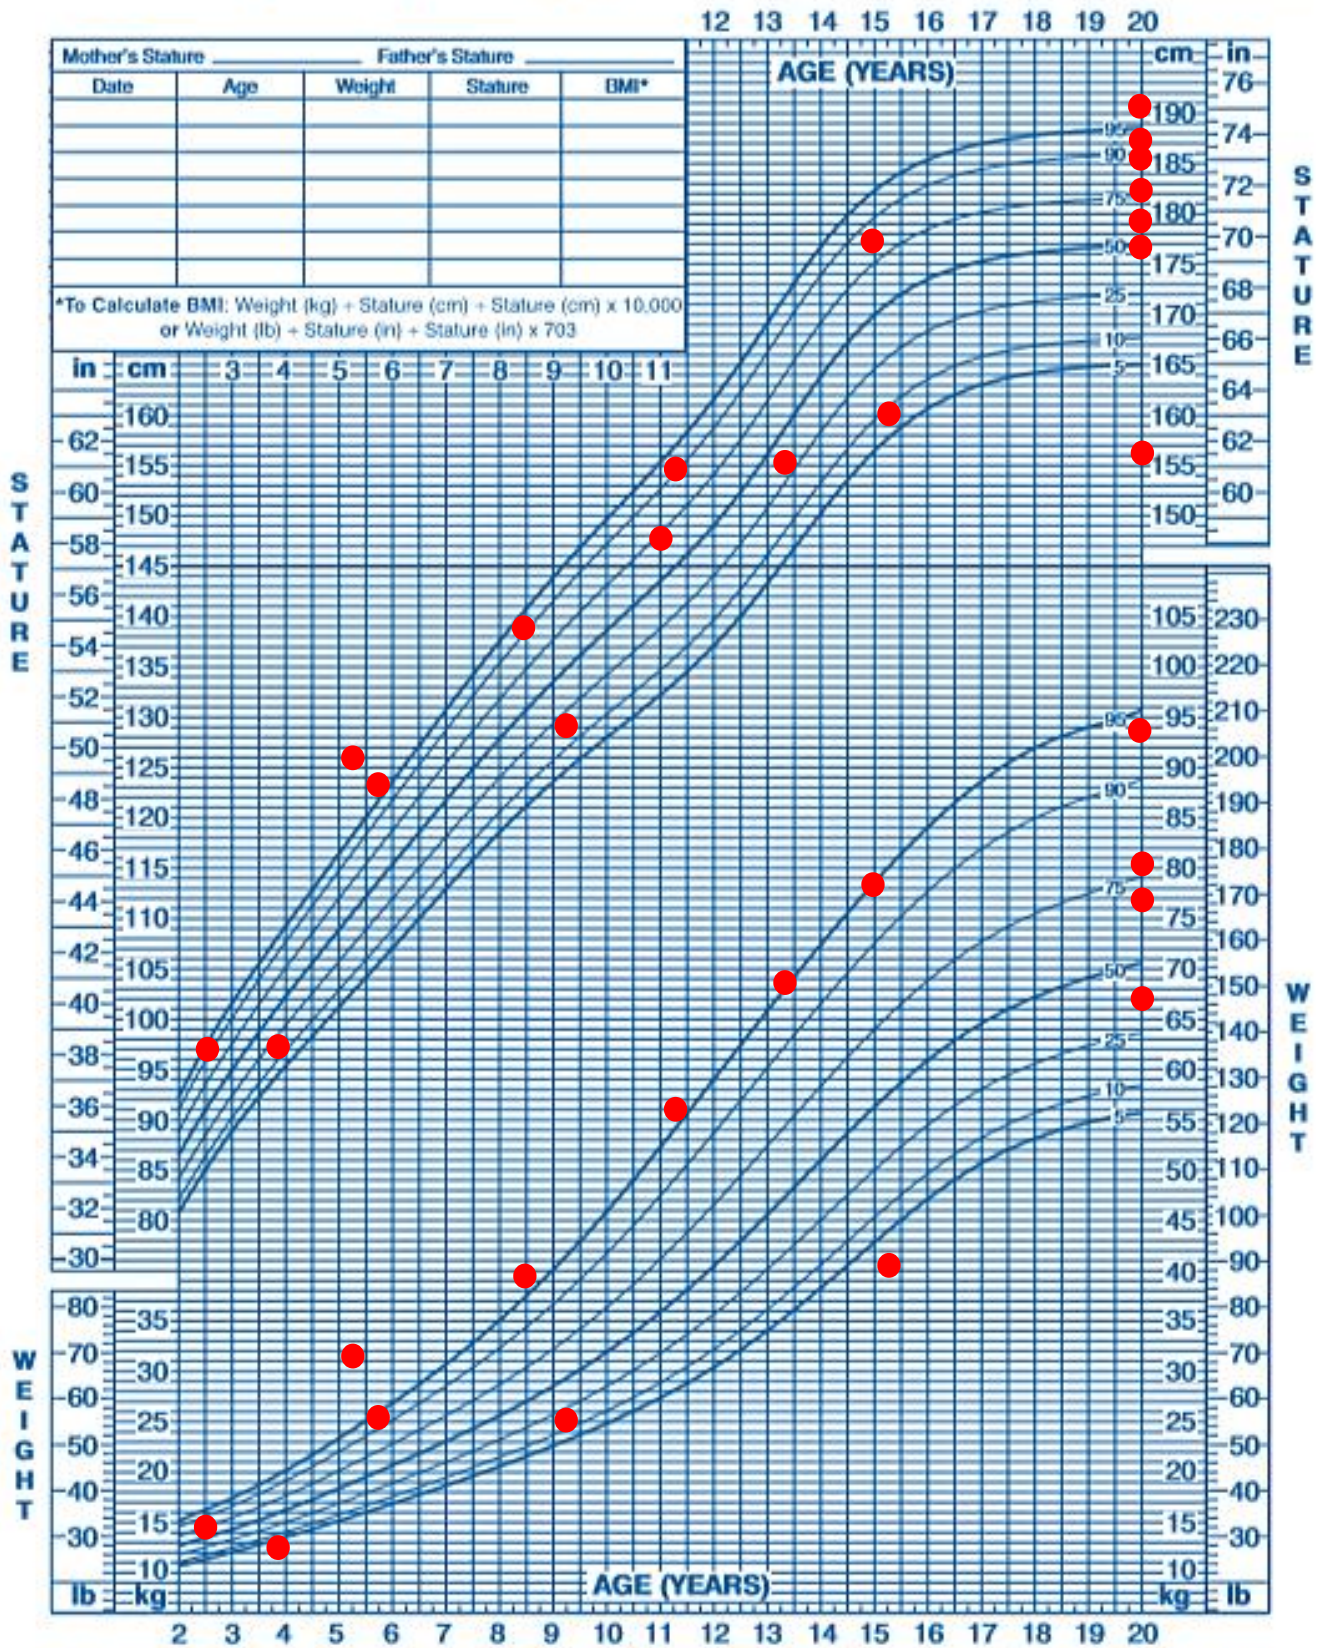

Published May 30, 2000 (modified 11/21/00).  
SOURCE: Developed by the National Center for Health Statistics in collaboration with  
the National Center for Chronic Disease Prevention and Health Promotion (2000).  
<http://www.cdc.gov/growthcharts>

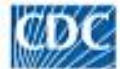

**2 to 20 years: Girls**  
**Stature-for-age and Weight-for-age percentiles**

NAME \_\_\_\_\_

RECORD # \_\_\_\_\_

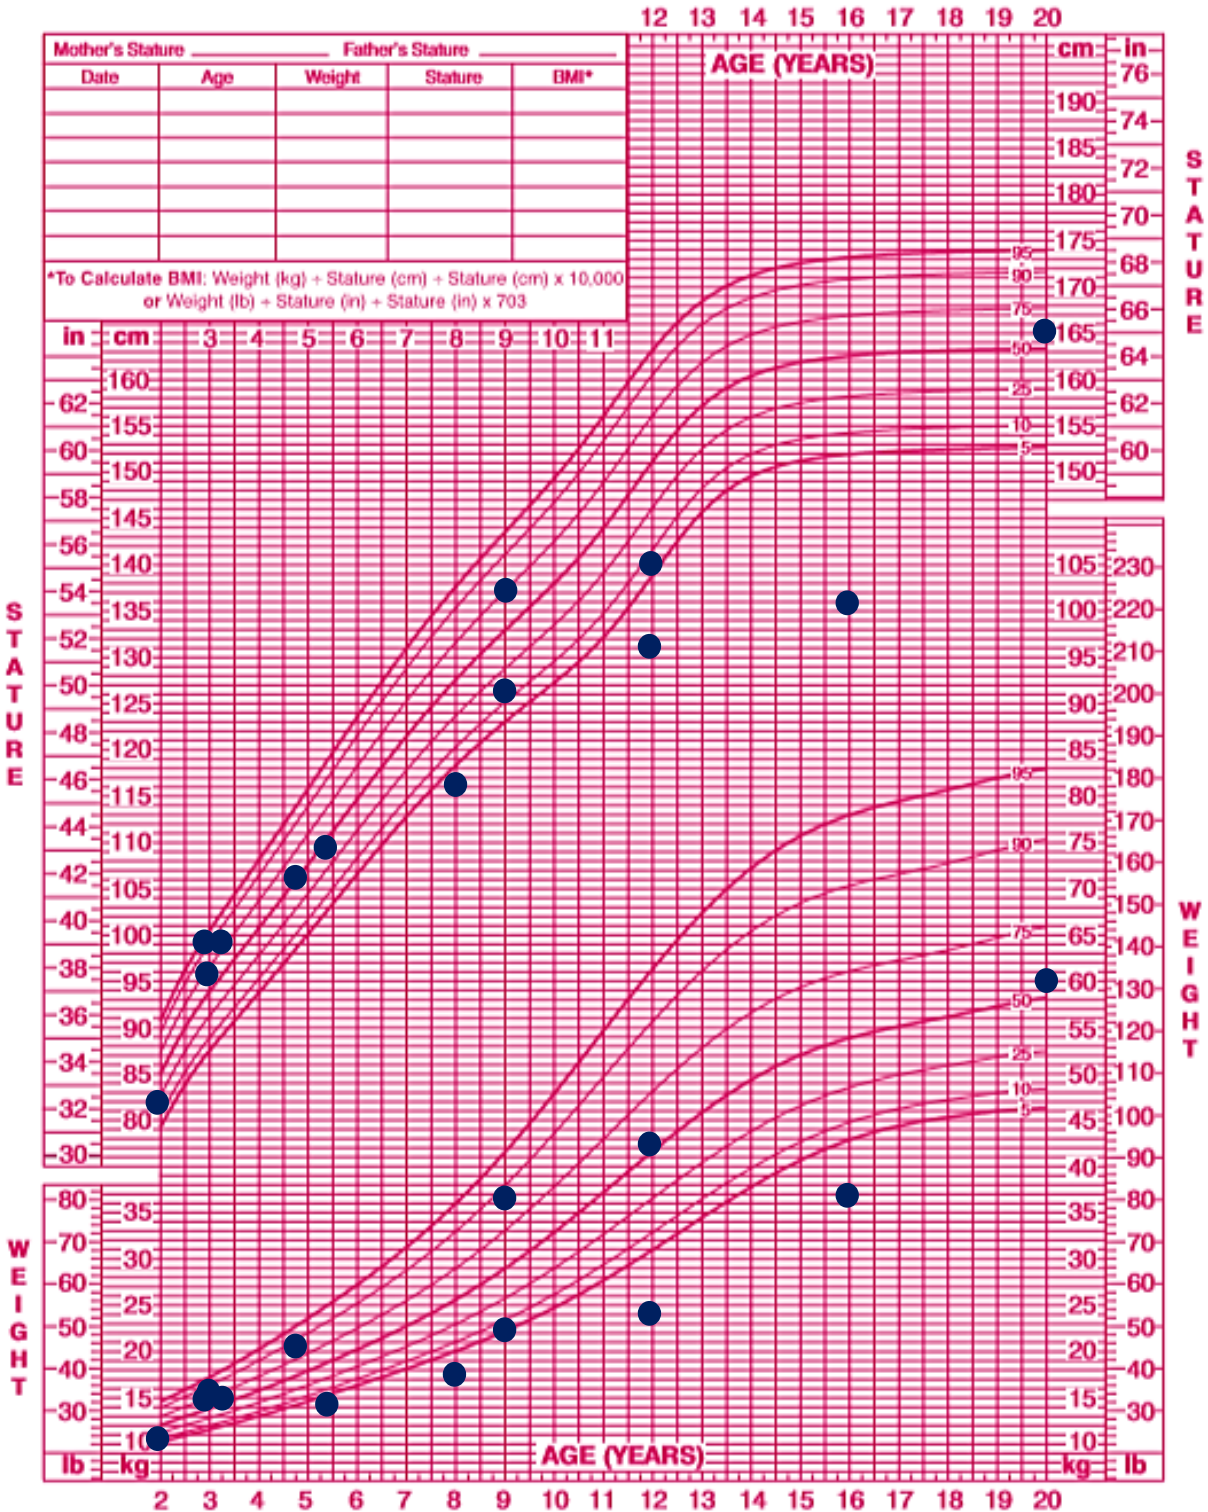

Published May 30, 2000 (modified 11/21/00).  
 SOURCE: Developed by the National Center for Health Statistics in collaboration with the National Center for Chronic Disease Prevention and Health Promotion (2000).  
<http://www.cdc.gov/growthcharts>

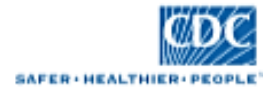

c

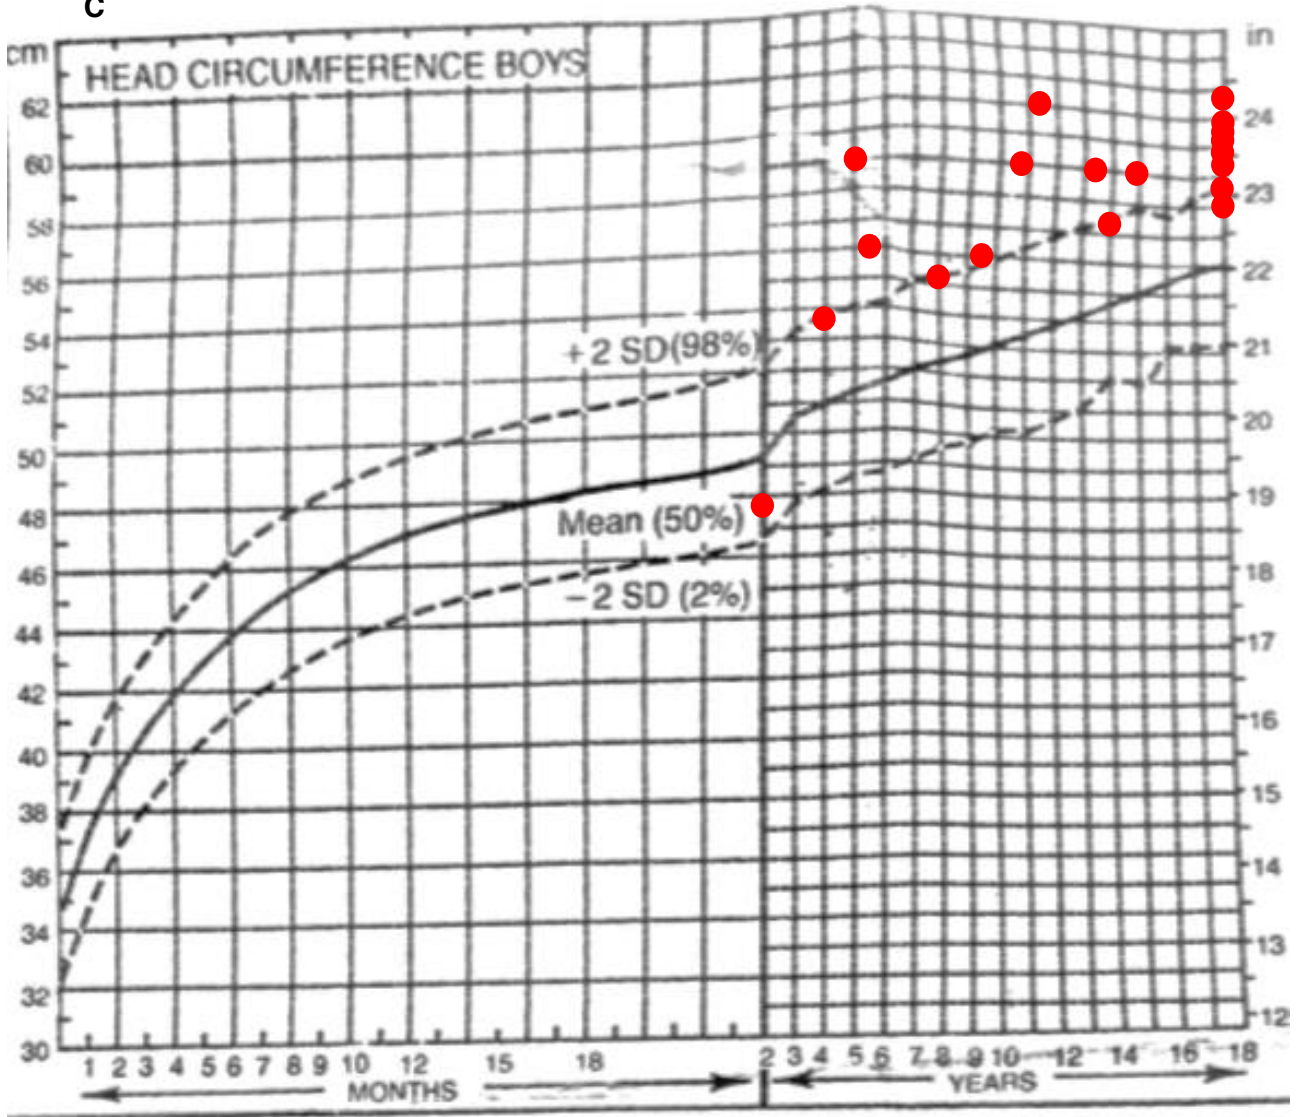

D

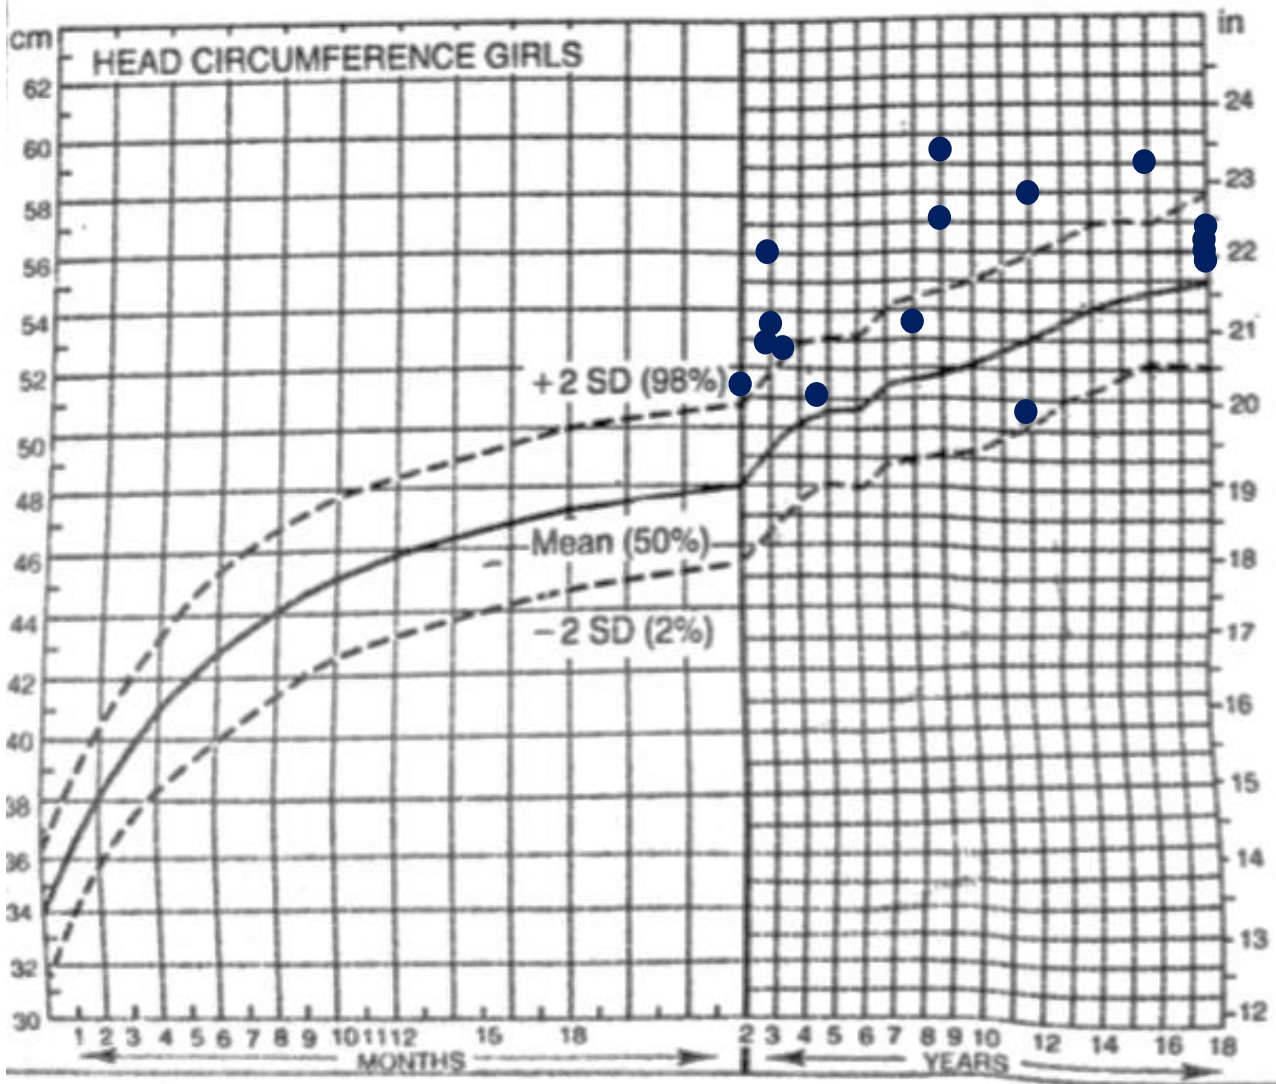

Figure 2
