# Supplementary figures and images for: Primrose syndrome: Characterization of the phenotype in 42 patients
Source: PubMed Central journal article supplement — Clin Genet. 2020 Apr 20;97(6):890–901. doi: 10.1111/cge.13749 (PMC7384157; doi:10.1111/cge.13749), 2020-04-20

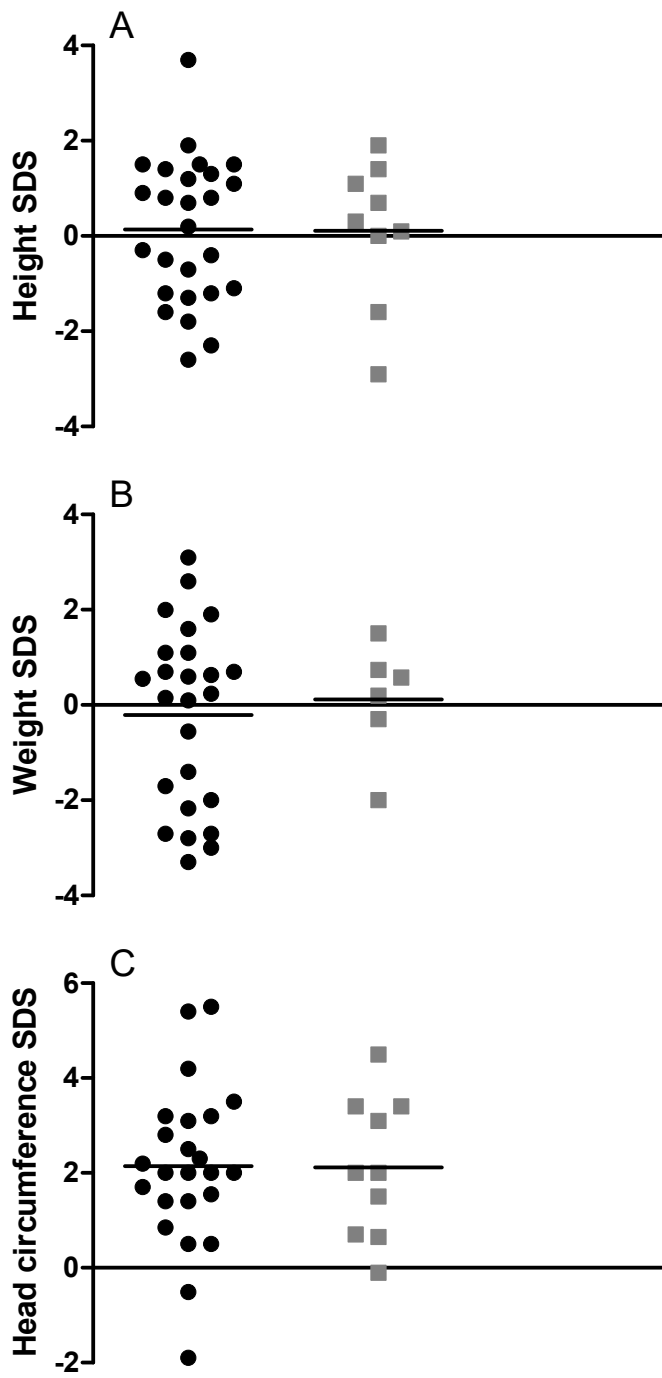

Supplemental Figure 2

Supplement: CGE-97-890-s004.pdf [file CGE-97-890-s004.pdf]
